# Supplementary material for: Evaluation of the mortality registry in Ecuador (2001–2013) – social and geographical inequalities in completeness and quality
Source: PubMed Central journal article supplement (PMC6437878; doi:10.1186/s12963-019-0183-y), 2019-03-28

# Garbage Codes and Deaths not Coded by a Medical Doctor (MD)

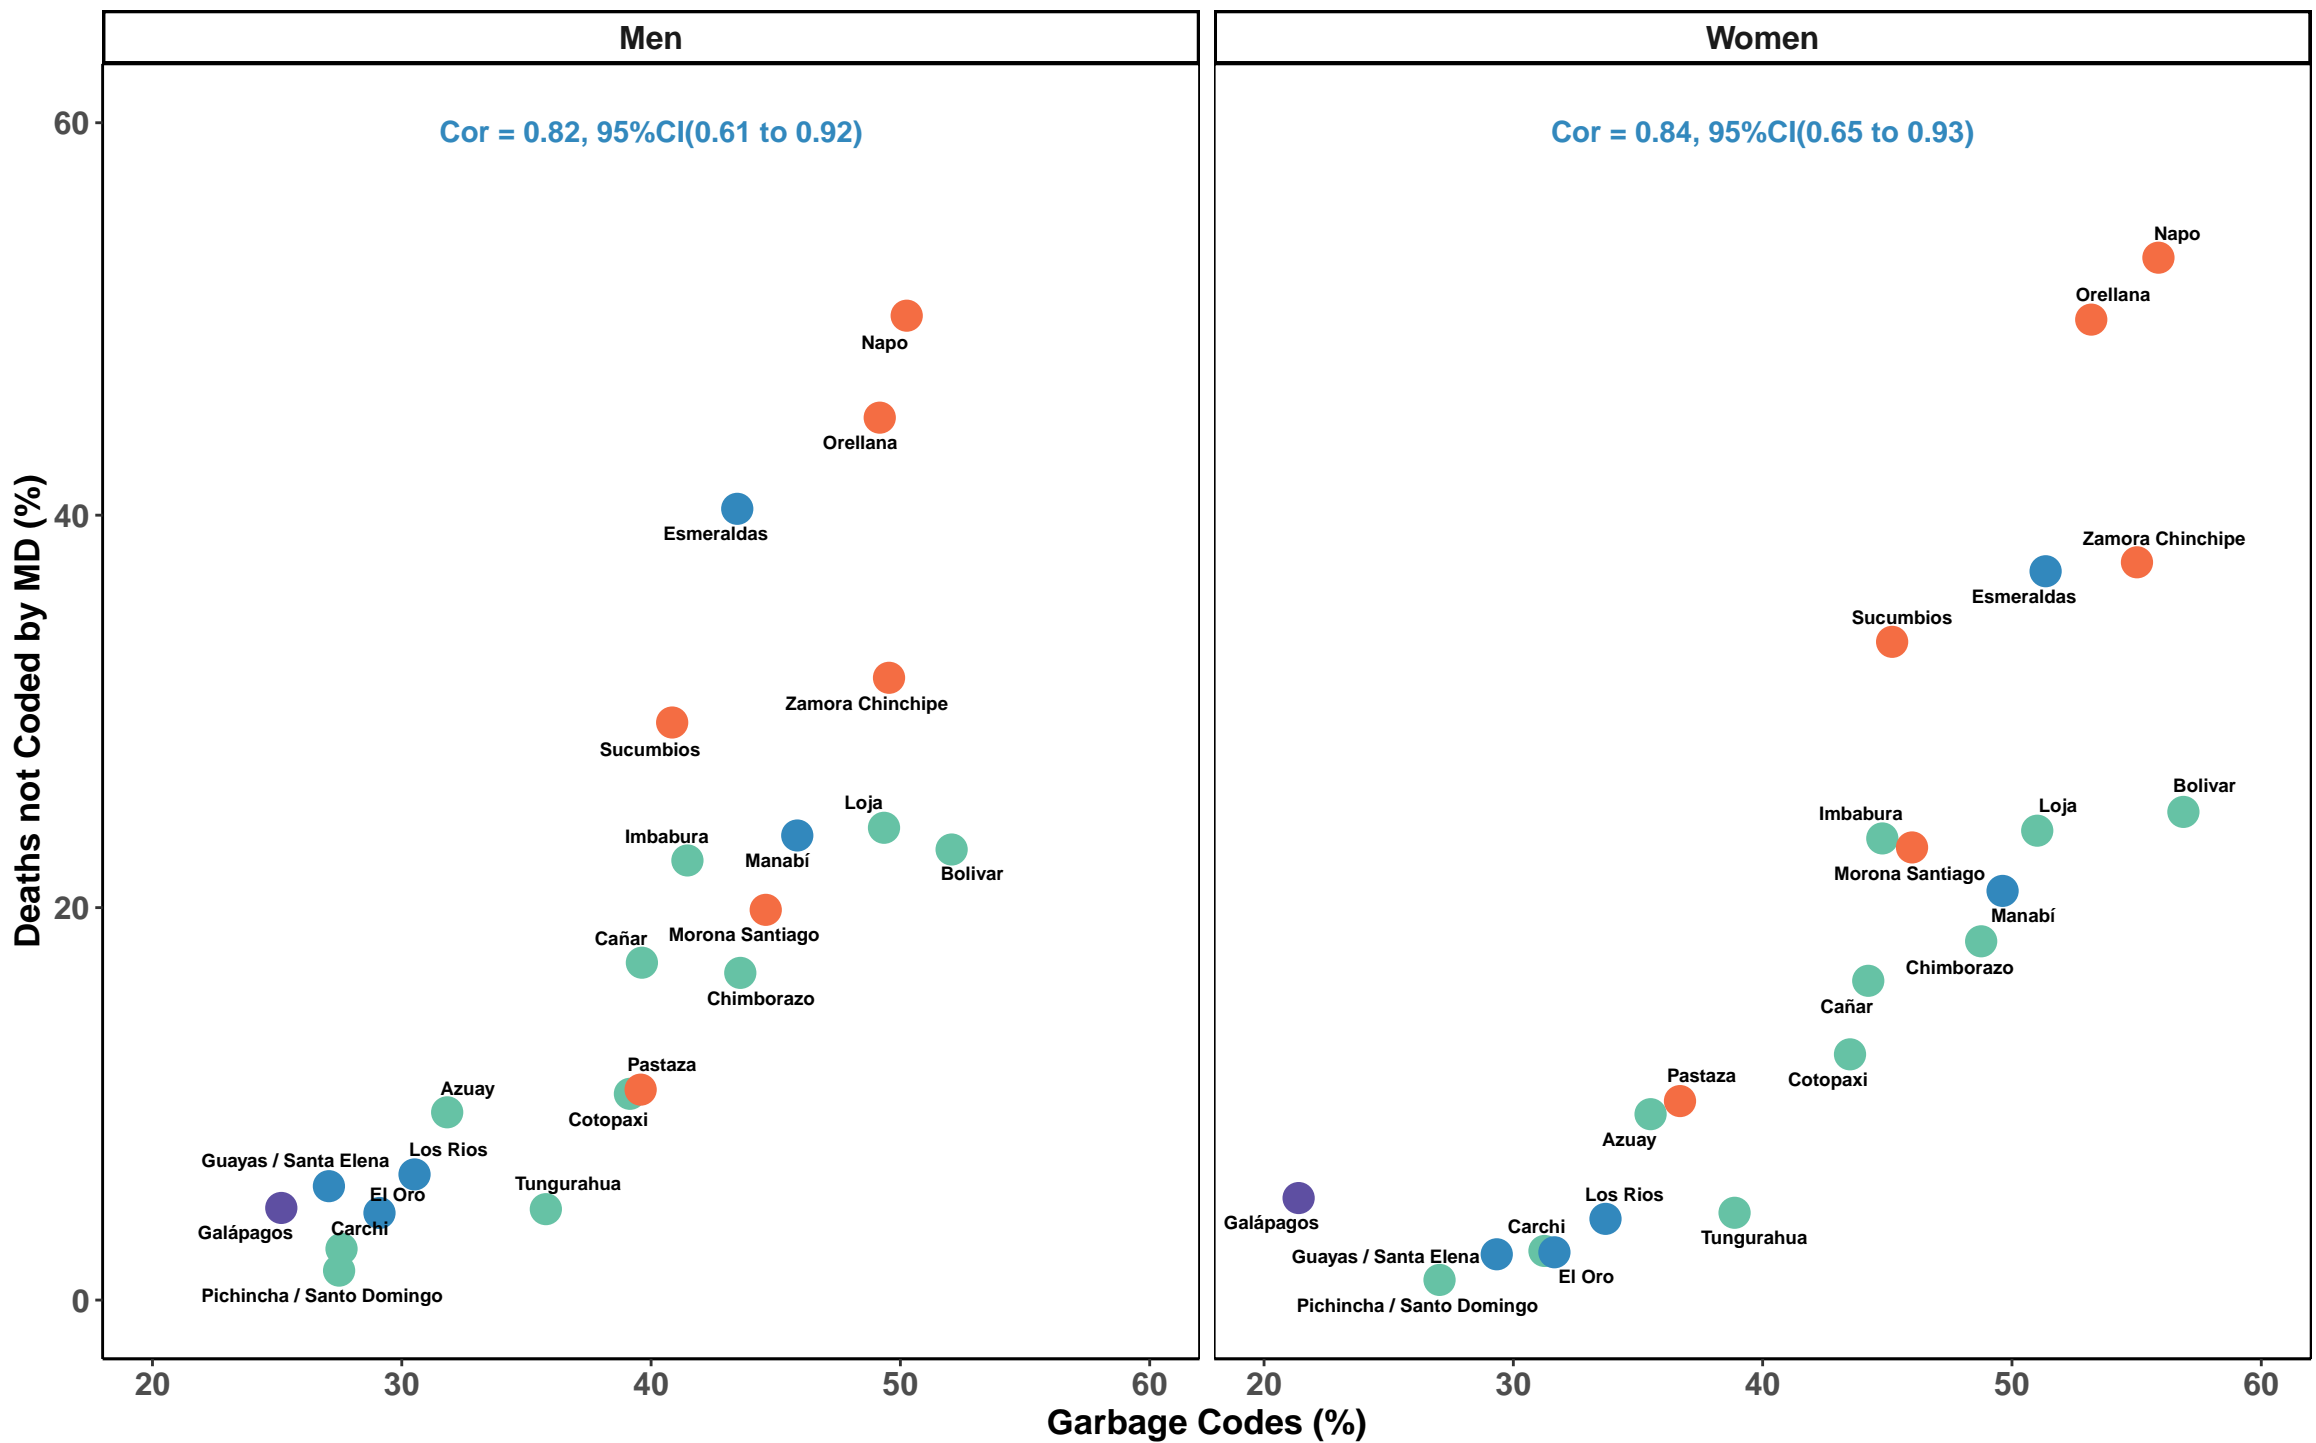

Supplement: 12963_2019_183_MOESM5_ESM.pdf [file 12963_2019_183_MOESM5_ESM.pdf]
